# Supplementary material for: Enhancement of the electrochemical properties of commercial coconut shell-based activated carbon by H2O dielectric barrier discharge plasma
Source: R Soc Open Sci. 2019 Feb 13;6(2):180872. doi: 10.1098/rsos.180872 (PMC6408405; doi:10.1098/rsos.180872)
Supplement: XPS spectra of CSAC and HCSAC;Electrochemical performance data of samples prepared under different time and power [file rsos180872supp1.docx]

Supporting Information

**Enhancement** **on the electrochemical properties of commercial coconut shell-based activated carbon by H2O dielectric barrier discharge plasma**

Xin Wang1,2, Xiaoyan Zhou1,2*, Weimin Chen1,2*, Minzhi Chen1,2and Chaozheng Liu1,2

1College of Materials and Engineering, Nanjing Forestry University, Nanjing, 210037, China.

2Jiangsu Engineering Research Center of Fast-growing Trees and Agri-fiber Materials, Nanjing 210037, China

*Corresponding author:

E-mail address: [zhouxiaoyan@njfu.edu.cn](mailto:zhouxiaoyan@njfu.edu.cn) (XY. Zhou); [cwmwood@163.com](mailto:cwmwood@163.com) (WM. Chen).





Fig. S1 XPS spectra of CSAC and HCSAC


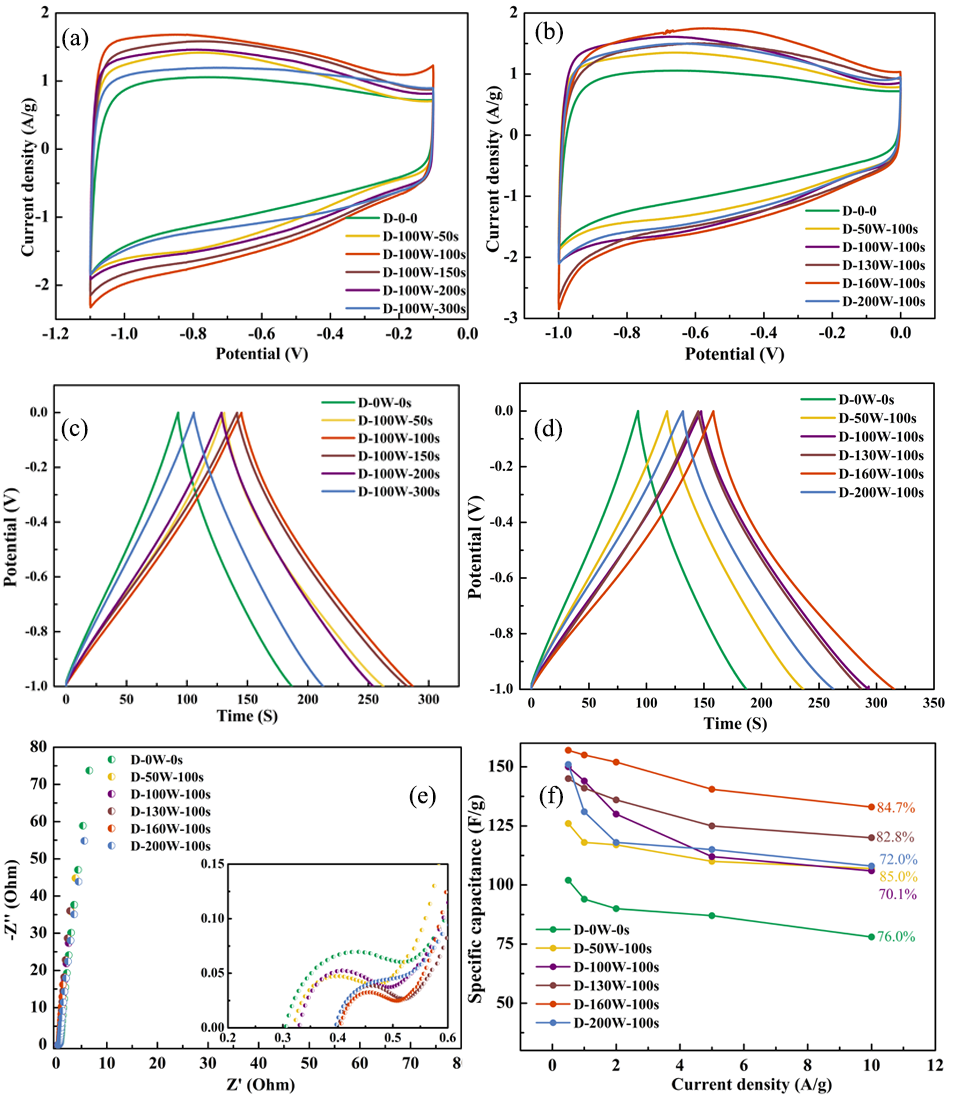


Fig. S2 (a-b) CV curves of CSAC and CSAC modified with DBD H2O plasma in a three-system with 6 M KOH aqueous electrolyte at the scan rate of 10 mV s-1. (c-d) GCD curves of CSAC and CSAC modified with DBD H2O plasma in a three-electrode system with 6 M KOH aqueous electrolyte at the current density of 1 A g-1. (e) Nyquist plots of CSAC and CSAC modified at different power electrodes. The inset is the detail with enlarged scale (f) Rate capability of CSAC and CSAC modified at different power at the current density from 0.5 to 10 A g-1.
